# Supplementary material for: Dual-Antigen COVID-19 Vaccine Subcutaneous Prime Delivery With Oral Boosts Protects NHP Against SARS-CoV-2 Challenge
Source: Frontiers journal article supplement (doi:10.3389/fimmu.2021.729837), 2021-09-16
Supplement: Data_Sheet_1.pdf [file Data_Sheet_1.pdf]

## Supplementary Material for:

### **Dual-antigen COVID-19 vaccine subcutaneous prime delivery with oral boosts protects NHP against SARS-CoV-2 challenge**

Elizabeth Gabitzsch, Jeffrey T. Safrit, Mohit Verma, Adrian Rice, Peter Sieling, Lise Zakin, Annie Shin, Brett Morimoto, Helty Adisetiyo, Raymond Wong, Ashish Bezawada, Kyle Dinkins, Joseph Balint, Victor Peykov, Hermes Garban, Philip Liu, Andrew Bacon, Pete Bone, Jeff Drew, Daniel C. Sanford, Patricia Spilman, Lennie Sender, Shahrooz Rabizadeh, Kayvan Niazi, and Patrick Soon-Shiong

#### **Vaccine construct sequences**

The spike sequence used was based on Genbank accession number MN908947 (<https://www.ncbi.nlm.nih.gov/nuccore/MN908947>). The sequence used for ‘S-fusion’ is shown below with the HA tag underlined and the proprietary fusion sequence (immediately following HA) represented as Xs.

MFVFLVLLPLVSSYPYDVPDYXXXXXXXXXXXXXXXXXXXXQCVNLTTRTQLPPAYTNSFT  
RGVYYPDKVFRSSVLHSTQDLFLPFFSNVTWFHAIHVSGTNGTKRFDNPVLPFNDGVYF  
ASTEKSNIIRGWIFGTTLDSTQSLIVNNATNVVIKVCFCNDPFLGVYYHKNNKSW  
MESEFRVYSSANNCTFEYVSQPFLMDLEGKQGNFKNLREFVFNIDGYFKIYKHTPINL  
VRDLPQGFSALEPLVDLPIGINITRFQTLALHRSYLTTPGDSSSGWTAGAAAYYVGYLQP  
RTFLKYNENGTITDAVDCALDPLSETKCTLSFTVEKGIYQTSNFRVQPTESIVRFPNIT  
NLCPFGEVFNATRFASVYAWNKRISNCVADYSVLVNSASFSTFKCYGVSPTKLNLCF  
TNVYADSFVIRGDEVQRQIAPGQTGKIADYNYKLPDDFTGCVIAWNSNNLDSKVGGNYN  
YLYRLFRKSNLKPFRDISTEYQAGSTPCNGVEGFNCYFPLQSYGFQPTNGVGYQPYRV  
VLSFELLHAPATVCGPKKSTNLVKNKCVNFNFNGLTGTGVLTESNKKFLPFQFGRDI  
ADTTDAVRDPQTLEILDITPCSFGGVSVITPGTNTSNQVAVLYQDVNCTEVPVAIHADQL  
TPTWRVYSTGSNVFQTRAGCLIGAHEVNNSYECDIPIGAGICASYQTQTNSPRRARSVAS  
QSHAYTMSLGAENSVAYSNNIAIPTNFTISVTTEILPVSMTKTSVDCTMYICGDSTECN  
LLQYGSFCTQLNRALTGIAVEQDKNTQEVFAQVKQIYKTPPIKDFGGFNFSQILPDPSKP  
SKRSFIEDLLFNKVTADAGFIKQYGDCLGDIAARDLICAQKFNGLTVLPLLTDEMIAQ  
YTSALLAGTITSGWTFGAGAALQIPFAMQMAYRFNGIGVTQNVLYENQKLIANQFNSAI  
GKIQDSLSTASALGKLQDVVNQNAQALNTLVKQLSSNFGAISSVLNDILSRDKVEAEV  
QIDRLITGRLQSLQTYVTQQLRAAEIRASANLAATKMSECVLGQSKRVDFCGKGYHLM  
SFPQSAPHGVVFLHVTYVPAQEKNFTTAPAICHDGKAHFPREGVFVSNGTHWFTQRNF  
YEPQIITDNTFVSGNCDVVIGIVNNTVYDPLQPELDSFKEELDKYFKNHTSPDVDLGDIS  
GINASVVNIQKEIDRLNEVAKNLNESLIDLQELGKYEYQYIKWPWYIWLGFIAGLIAIMV  
TIMLCCMTSCCCLKGCCSCGSCCKFDEDDSEPVLKGVKLHYT

The N sequence used was based on GenBank accession number MN908947 (<https://www.ncbi.nlm.nih.gov/nuccore/MN908947>). The proprietary ETSD sequences (both 3' and 5') are shown as Os, and the FLAG tag immediately following is underlined; linkers bracketing the NLV peptide (the first 3 amino acids of 9 amino acid CMV phosphoprotein 65, used to evaluate non-vaccine antigen-elicited T cell responses) are highlighted in grey.

OOOOOOOOOOOOOOOOOOOOODYKDDDDKMSDNGPQNQRNAPRITFGGSPDSTGSNQ  
 GERSGARSKQRRPQGLPNNTASWFTALTQHGKEDLKFPRGQGVPIINTNSSPDDQIGYYR  
 RATRRIRGGDGKMKDLSPRWYFYLLGTGPEAGLPYGANKDGIWVATEGALNTPKDH  
 GTRNPANNAIIVLQLPQGTTLPGKFYAEGSRGGSQASSRSSSRNSSRNSTPGSSRGTS  
 ARMAGNGGDAALALLLDRLNQLESKMSGKGQQQQGQTVTKKSAAEASKKPRQKRT  
 ATKAYNVTQAFGRRGPEQTQGNFGDQELIRQGTQDYKHWPQIAQFAPSASAFFGMSRIG  
 MEVTPSGTWLTYTGAIKLDDKDPNFKDQVILLNKHIDAYKTFPPTPEPKDKKKKADETQ  
 ALPQRQKKQQTVTLLPAADLDDFSKQLQQSMSSADSTQAGPGPGNLVPMVATVGP  
 OOOOOOOOOOOOOOOOOOOOOOOOOOOOOOOOOOOOOOOOOOOOOOOOOOOOOOO

## The NHP Study

### *Clinical signs*

No clinical signs were noted during the twice daily observations for clinical signs of toxicity due to vaccination and no animals died during the two weeks after one subcutaneous immunization of  $1 \times 10^{11}$  VP or a week after an oral booster of  $1 \times 10^{10}$  IU of hAd5-S-Fusion+N-ETSD. No gross pathological effect or adverse events were observed and there were no notable changes in body weight (Supplementary Fig. S1).

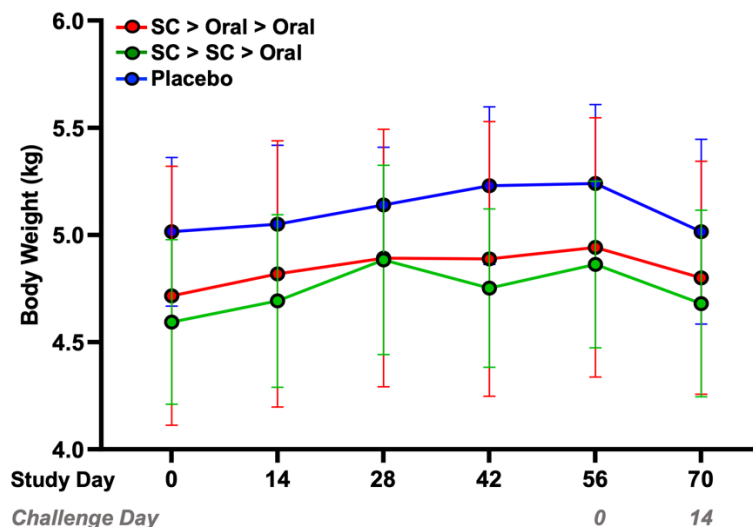

**Figure S1.** NHP body weights over the course of the study. Body weights are shown in Kg; note y-axis range is 4-6 Kg.

### *Hematology*

Hematological parameters evaluated in Group 1 and 2 hAd5 S-Fusion + N-ETSD and Group 3 placebo control animals are presented in Table S1. Only hemoglobin was consistently slightly lower in Group 2 NHP as compared to Group 3 placebo for all post-vaccination time points.

**Table S1.** Hematological parameters in hAd5 S-Fusion + N-ETSD vaccinated Group 1 and Group 2 NHP versus placebo Group 3.

| Study Day              | Day 0 |        |       | Day 14 |        |       | Day 28 |        |       | Day 42 |        |       | Day 56 |        |       | Day 63 |        |       | Day 70 |        |       |
|------------------------|-------|--------|-------|--------|--------|-------|--------|--------|-------|--------|--------|-------|--------|--------|-------|--------|--------|-------|--------|--------|-------|
| Parameter              | G1    | G2     | G3    | G1     | G2     | G3    | G1     | G2     | G3    | G1     | G2     | G3    | G1     | G2     | G3    | G1     | G2     | G3    | G1     | G2     | G3    |
| White Blood Cell Count | ND    | ND     | -     | ND     | ND     | -     | ND     | ND     | -     | ND     | ND     | -     | ND     | ND     | -     | ND     | ND     | -     | ND     | ND     | -     |
| Red Blood Cell Count   | ND    | ND     | -     | ND     | ND     | -     | 5.42   | ↓4.88  | 5.42  | ND     | ND     | -     | ND     | ND     | -     | ND     | ND     | -     | ND     | ND     | -     |
| Hemoglobin             | ND    | ND     | -     | 13.26  | ↓11.18 | 13.10 | 13.84  | ↓11.80 | 13.90 | 12.90  | ↓11.24 | 12.75 | 13.88  | ↓12.00 | 14.05 | 12.42  | ↓10.36 | 11.95 | 13.86  | ↓11.74 | 13.10 |
| Hematocrit             | ND    | ND     | -     | 40.68  | 34.78  | 41.30 | 42.70  | ↓36.88 | 45.00 | ND     | ND     | -     | ND     | ND     | -     | ND     | ND     | -     | ND     | ND     | -     |
| MCV                    | ND    | ND     | -     | ND     | ND     | -     | ND     | ND     | -     | ND     | ND     | -     | ND     | ND     | -     | ND     | ND     | -     | ND     | ND     | -     |
| MCH                    | ND    | ND     | -     | ND     | ND     | -     | ND     | ND     | -     | ND     | ND     | -     | ND     | ND     | -     | ND     | ND     | -     | ND     | ND     | -     |
| MCHC                   | ND    | ND     | -     | ND     | ND     | -     | ND     | ND     | -     | ND     | ND     | -     | ND     | ND     | -     | ND     | ND     | -     | ND     | ND     | -     |
| CHCM                   | ND    | ND     | -     | ND     | ND     | -     | ND     | ND     | -     | ND     | ND     | -     | ND     | ND     | -     | ND     | ND     | -     | ND     | ND     | -     |
| RDW                    | ND    | ND     | -     | ND     | ND     | -     | ND     | ND     | -     | ND     | ND     | -     | ND     | ND     | -     | ND     | ND     | -     | ND     | ND     | -     |
| Platelet Count         | 305.0 | ↑424.4 | 293.5 | ND     | ND     | -     | ND     | ND     | -     | ND     | ND     | -     | ND     | ND     | -     | ND     | ND     | -     | ND     | ND     | -     |
| MPV                    | ND    | ND     | -     | ND     | ND     | -     | ND     | ND     | -     | ND     | ND     | -     | ND     | ND     | -     | ND     | ND     | -     | ND     | ND     | -     |
| %NEUT                  | ND    | ND     | -     | ND     | ND     | -     | ND     | ND     | -     | ND     | ND     | -     | ND     | ND     | -     | ND     | ND     | -     | ND     | ND     | -     |
| %LYMPH                 | ND    | ND     | -     | ND     | ND     | -     | ND     | ND     | -     | ND     | ND     | -     | ND     | ND     | -     | ND     | ND     | -     | ND     | ND     | -     |
| %MONO                  | ND    | ND     | -     | ND     | ND     | -     | ND     | ND     | -     | ND     | ND     | -     | ND     | ND     | -     | ND     | ND     | -     | ND     | ND     | -     |
| %EOS                   | ND    | ND     | -     | ND     | ND     | -     | ND     | ND     | -     | ND     | ND     | -     | ND     | ND     | -     | ND     | ND     | -     | ND     | ND     | -     |
| %BASO                  | 0.12  | ↑0.22  | 0.10  | ND     | ND     | -     | ND     | ND     | -     | ND     | ND     | -     | ↓1.06  | 1.14   | 2.05  | ND     | ND     | -     | ND     | ND     | -     |
| %LUC                   | ND    | ND     | -     | ND     | ND     | -     | ND     | ND     | -     | ND     | ND     | -     | ND     | ND     | -     | ND     | ND     | -     | ND     | ND     | -     |
| #NEUT                  | ND    | ND     | -     | ND     | ND     | -     | ND     | ND     | -     | ND     | ND     | -     | ND     | ND     | -     | ND     | ND     | -     | ND     | ND     | -     |
| #LYMPH                 | ND    | ND     | -     | ND     | ND     | -     | ND     | ND     | -     | ND     | ND     | -     | ND     | ND     | -     | ND     | ND     | -     | ND     | ND     | -     |
| #MONO                  | ND    | ND     | -     | ND     | ND     | -     | ND     | ND     | -     | ND     | ND     | -     | ND     | ND     | -     | ND     | ND     | -     | ND     | ND     | -     |
| #EOS                   | ND    | ND     | -     | ND     | ND     | -     | ND     | ND     | -     | ND     | ND     | -     | ND     | ND     | -     | ND     | ND     | -     | ND     | ND     | -     |
| #BASO                  | ND    | ND     | -     | ND     | ND     | -     | ND     | ND     | -     | ND     | ND     | -     | ND     | ND     | -     | ND     | ND     | -     | ND     | ND     | -     |
| #LUC                   | ND    | ND     | -     | ND     | ND     | -     | ND     | ND     | -     | ND     | ND     | -     | ND     | ND     | -     | ND     | ND     | -     | ND     | ND     | -     |
| Neut%/Lymph% Ratio     | ND    | ND     | -     | ND     | ND     | -     | ND     | ND     | -     | ND     | ND     | -     | ND     | ND     | -     | ND     | ND     | -     | ND     | ND     | -     |
| Neut#/Lymph# Ratio     | ND    | ND     | -     | ND     | ND     | -     | ND     | ND     | -     | ND     | ND     | -     | ND     | ND     | -     | ND     | ND     | -     | ND     | ND     | -     |

ND= Difference between placebo control and hAd5 S-Fusion + N-ETSD vaccinated NHP for this time point was not statistically significant

↑= increase was statistically significant (p <0.05)

↓= decrease was statistically significant (p <0.05)

## Clinical Chemistry

Only creatinine was consistently lower in Group 1 NHP on five time points and at two time points for Group 2 (Table S2), but it was lower on Day 0 baseline, indicating this was not vaccine-related.

**Table S2.** Clinical chemistry for hAd5 S-Fusion + N-ETSD vaccinated Group 1 and Group 2 NHP as compared to placebo Group 3. ND – not significantly different from placebo. Statistical analyses performed using One-way ANOVA.

| Study Day                  | Day 0 |        |       | Day 14 |        |       | Day 28 |      |      | Day 42 |       |      | Day 56 |       |      | Day 63 |    |    | Day 70 |    |    |
|----------------------------|-------|--------|-------|--------|--------|-------|--------|------|------|--------|-------|------|--------|-------|------|--------|----|----|--------|----|----|
| Parameter                  | G1    | G2     | G3    | G1     | G2     | G3    | G1     | G2   | G3   | G1     | G2    | G3   | G1     | G2    | G3   | G1     | G2 | G3 | G1     | G2 | G3 |
| Glucose                    | ND    | ND     | -     | ND     | ND     | -     | ND     | ND   | -    | ND     | ND    | -    | ND     | ND    | -    | ND     | ND | -  | ND     | ND | -  |
| Blood Urea Nitrogen        | ND    | ND     | -     | ND     | ND     | -     | ND     | ND   | -    | ND     | ND    | -    | ND     | ND    | -    | ND     | ND | -  | ND     | ND | -  |
| Creatinine                 | ↓0.57 | 0.66   | 0.79  | ↓0.49  | 0.58   | 0.75  | ↓0.69  | 0.76 | 0.88 | ↓0.59  | ↓0.64 | 0.82 | ↓0.67  | ↓0.71 | 0.88 | ND     | ND | -  | ND     | ND | -  |
| BUN/Creatinine Ratio       | ND    | ND     | -     | 32.74  | ↑42.98 | 27.15 | ND     | ND   | -    | ND     | ND    | -    | ND     | ND    | -    | ND     | ND | -  | ND     | ND | -  |
| Sodium                     | ND    | ND     | -     | ND     | ND     | -     | ND     | ND   | -    | ND     | ND    | -    | ND     | ND    | -    | ND     | ND | -  | ND     | ND | -  |
| Potassium                  | ND    | ND     | -     | ND     | ND     | -     | ND     | ND   | -    | ND     | ND    | -    | ND     | ND    | -    | ND     | ND | -  | ND     | ND | -  |
| Chloride                   | ND    | ND     | -     | ND     | ND     | -     | ND     | ND   | -    | ND     | ND    | -    | ND     | ND    | -    | ND     | ND | -  | ND     | ND | -  |
| Calcium                    | ND    | ND     | -     | 9.50   | ↓9.17  | 9.78  | ND     | ND   | -    | ND     | ND    | -    | ND     | ND    | -    | ND     | ND | -  | ND     | ND | -  |
| Phosphorus                 | ND    | ND     | -     | ND     | ND     | -     | ND     | ND   | -    | ND     | ND    | -    | ND     | ND    | -    | ND     | ND | -  | ND     | ND | -  |
| Total Bilirubin            | ND    | ND     | -     | ND     | ND     | -     | ND     | ND   | -    | ND     | ND    | -    | ND     | ND    | -    | ND     | ND | -  | ND     | ND | -  |
| Total Protein              | ND    | ND     | -     | ND     | ND     | -     | ND     | ND   | -    | ND     | ND    | -    | ND     | ND    | -    | ND     | ND | -  | ND     | ND | -  |
| Albumin                    | ND    | ND     | -     | 4.40   | ↓4.00  | 4.67  | ND     | ND   | -    | ND     | ND    | -    | ND     | ND    | -    | ND     | ND | -  | ND     | ND | -  |
| Globulin                   | ND    | ND     | -     | ND     | ND     | -     | ND     | ND   | -    | ND     | ND    | -    | ND     | ND    | -    | ND     | ND | -  | ND     | ND | -  |
| A/G Ratio                  | ND    | ND     | -     | ND     | ND     | -     | ND     | ND   | -    | ND     | ND    | -    | ND     | ND    | -    | ND     | ND | -  | ND     | ND | -  |
| Alanine Aminotransferase   | 50.42 | ↓31.60 | 55.60 | ND     | ND     | -     | ND     | ND   | -    | ND     | ND    | -    | ND     | ND    | -    | ND     | ND | -  | ND     | ND | -  |
| Aspartate Aminotransferase | ND    | ND     | -     | ND     | ND     | -     | ND     | ND   | -    | ND     | ND    | -    | ND     | ND    | -    | ND     | ND | -  | ND     | ND | -  |
| Alkaline Phosphatase       | ND    | ND     | -     | ND     | ND     | -     | ND     | ND   | -    | ND     | ND    | -    | ND     | ND    | -    | ND     | ND | -  | ND     | ND | -  |
| Lactate Dehydrogenase      | ND    | ND     | -     | ND     | ND     | -     | ND     | ND   | -    | ND     | ND    | -    | ND     | ND    | -    | ND     | ND | -  | ND     | ND | -  |
| Gamma Glutamyl Transferase | ND    | ND     | -     | ND     | ND     | -     | ND     | ND   | -    | ND     | ND    | -    | ND     | ND    | -    | ND     | ND | -  | ND     | ND | -  |
| Sorbitol Dehydrogenase     | ND    | ND     | -     | ND     | ND     | -     | ND     | ND   | -    | ND     | ND    | -    | ND     | ND    | -    | ND     | ND | -  | ND     | ND | -  |
| C-Reactive Protein         | ND    | ND     | -     | ND     | ND     | -     | ND     | ND   | -    | ND     | ND    | -    | ND     | ND    | -    | ND     | ND | -  | ND     | ND | -  |

ND= Difference between placebo control and hAd5 S-Fusion + N-ETSD vaccine NHP for this time point was not statistically significant

↑= increase was statistically significant (p <0.05)

↓= decrease was statistically significant (p <0.05)

## Viral gRNA in nasal swab samples

Viral load was determined in nasal swab samples by RT qPCR of genomic RNA. The data for individual NHP at time point post-challenge are shown in **Table S3**.

**Table S3.** *Gene copies per mL for gRNA as determined by RT qPCR in nasal passages for all groups.* Values below the level of detection (LOD) of 54 gene copies per mL (GC/mL) are highlighted in yellow. For calculation of the geometric mean, half the LOD values (27 GC/mL) was used.

| Animal ID | Grp # | Routes       | Sex    | Day 56 | Day 57   | Day 58   | Day 59   | Day 60   | Day 61   | Day 62   | Day 63   | Day 70   |
|-----------|-------|--------------|--------|--------|----------|----------|----------|----------|----------|----------|----------|----------|
| RA3938    | 1     | SC-SC-Oral   | Male   | <LOD   | 5.47E+08 | 3.67E+06 | 2.52E+04 | 2.50E+04 | 2.90E+03 | 1.87E+02 | 1.04E+03 | <LOD     |
| RA3946    | 1     | SC-SC-Oral   | Male   | <LOD   | 2.59E+08 | 2.04E+07 | 1.38E+06 | 2.46E+05 | 9.01E+04 | 3.29E+03 | <LOD     | <LOD     |
| RA3945    | 1     | SC-SC-Oral   | Male   | <LOD   | 2.06E+07 | 1.19E+07 | 9.32E+05 | 1.73E+05 | 1.97E+03 | 9.83E+03 | 5.71E+02 | 4.29E+02 |
| RA4002    | 1     | SC-SC-Oral   | Female | <LOD   | 3.84E+07 | 1.21E+07 | 5.80E+03 | 1.95E+05 | 9.95E+03 | <LOD     | <LOD     | <LOD     |
| RA4000    | 1     | SC-SC-Oral   | Female | <LOD   | 1.52E+10 | 1.66E+04 | 2.75E+06 | 9.18E+05 | 7.36E+04 | 1.53E+04 | <LOD     | 7.79E+01 |
| RA3936    | 2     | SC-Oral-Oral | Male   | <LOD   | 1.13E+08 | 5.06E+06 | 2.53E+06 | 5.02E+05 | 2.04E+03 | 1.50E+03 | <LOD     | <LOD     |
| RA3942    | 2     | SC-Oral-Oral | Male   | <LOD   | 3.13E+08 | 3.59E+06 | 8.15E+05 | 5.62E+03 | 3.32E+02 | <LOD     | 1.01E+02 | <LOD     |
| RA3999    | 2     | SC-Oral-Oral | Female | <LOD   | 1.80E+08 | 2.65E+07 | 1.14E+06 | 3.31E+04 | 2.39E+03 | 1.41E+03 | 1.76E+02 | <LOD     |
| RA4014    | 2     | SC-Oral-Oral | Female | <LOD   | 1.18E+09 | 4.64E+07 | 2.69E+05 | 3.09E+04 | 1.59E+03 | 1.68E+03 | 1.18E+02 | <LOD     |
| RA4001    | 2     | SC-Oral-Oral | Female | <LOD   | 1.67E+07 | 4.87E+06 | 3.89E+05 | 3.95E+04 | 5.48E+03 | 1.90E+03 | <LOD     | 2.74E+02 |
| RA3949    | 3     | SC-Oral-Oral | Male   | <LOD   | 2.06E+09 | 4.95E+08 | 4.12E+06 | 7.14E+07 | 7.02E+05 | 2.73E+05 | 1.62E+04 | 1.74E+04 |
| RA4011    | 3     | SC-Oral-Oral | Female | <LOD   | 6.95E+07 | 2.38E+07 | 3.00E+07 | 3.44E+05 | 1.56E+05 | 7.19E+05 | 4.61E+05 | 1.47E+04 |

### Viral gRNA in bronchoalveolar lavage (BAL) samples

Viral load was also determined in BAL samples. Gene copies per mL for individual NHP are shown in **Table S4**.

**Table S4.** *Gene copies per mL for gRNA as determined by RT qPCR in BAL samples for all groups.* Values below the level of detection (LOD) of 54 gene copies per mL (GC/mL) are highlighted in yellow. For calculation of the geometric mean, half the LOD values (27 GC/mL) was used.

| Animal ID | Group | Routes       | Sex    | Day 42 | Day 57   | Day 59   | Day 61   | Day 63   |
|-----------|-------|--------------|--------|--------|----------|----------|----------|----------|
| RA3938    | 1     | SC-SC-Oral   | Male   | <LOD   | 1.02E+06 | 1.26E+05 | <LOD     | 5.24E+02 |
| RA3946    | 1     | SC-SC-Oral   | Male   | <LOD   | 1.25E+05 | 1.04E+05 | 5.43E+04 | 3.31E+02 |
| RA3945    | 1     | SC-SC-Oral   | Male   | <LOD   | 1.33E+05 | 7.50E+04 | 1.22E+05 | 3.54E+03 |
| RA4002    | 1     | SC-SC-Oral   | Female | <LOD   | 1.40E+06 | 1.59E+04 | 8.74E+03 | 1.55E+02 |
| RA4000    | 1     | SC-SC-Oral   | Female | <LOD   | 1.44E+05 | 5.00E+03 | <LOD     | <LOD     |
| RA3936    | 2     | SC-Oral-Oral | Male   | <LOD   | 1.42E+06 | 3.55E+04 | 8.53E+03 | 1.43E+02 |
| RA3942    | 2     | SC-Oral-Oral | Male   | <LOD   | 4.80E+04 | 1.40E+02 | <LOD     | 1.75E+02 |
| RA3999    | 2     | SC-Oral-Oral | Female | <LOD   | 3.00E+06 | 2.28E+06 | 1.06E+06 | 1.31E+02 |
| RA4014    | 2     | SC-Oral-Oral | Female | <LOD   | 2.41E+06 | 7.39E+05 | 2.97E+04 | 1.90E+02 |
| RA4001    | 2     | SC-Oral-Oral | Female | <LOD   | 6.64E+03 | <LOD     | <LOD     | <LOD     |
| RA3949    | 3     | SC-Oral-Oral | Male   | <LOD   | 6.11E+07 | 3.44E+06 | 1.16E+05 | 2.35E+04 |
| RA4011    | 3     | SC-Oral-Oral | Female | <LOD   | 1.05E+07 | 1.20E+06 | 3.36E+05 | 1.74E+04 |

### Viral sgRNA in nasal swab samples

Gene copies per mL of subgenomic RNA (sgRNA) for individual NHP are shown in **Table S5**.

**Table S5.** *Data for sgRNA in nasal swab samples as determined by RT qPCR passages for all groups.* Values below the level of detection (LOD) of 119 gene copies per mL (GC/mL) are

highlighted in yellow. For calculation of the geometric mean, half the LOD values (59 GC/mL) was used.

| Animal ID | Group | Routes       | Sex    | Day 56 | Day 57   | Day 58   | Day 59   | Day 60   | Day 61   | Day 62   | Day 63   | Day 70 |
|-----------|-------|--------------|--------|--------|----------|----------|----------|----------|----------|----------|----------|--------|
| RA3938    | 1     | SC-SC-Oral   | Male   | <LOD   | 1.12E+07 | 1.27E+05 | <LOD     | 3.03E+02 | <LOD     | <LOD     | <LOD     | <LOD   |
| RA3946    | 1     | SC-SC-Oral   | Male   | <LOD   | 1.87E+07 | 1.21E+06 | 1.49E+05 | 1.32E+04 | 1.64E+04 | <LOD     | <LOD     | <LOD   |
| RA3945    | 1     | SC-SC-Oral   | Male   | <LOD   | 1.81E+06 | 6.41E+05 | 6.41E+04 | 1.35E+04 | <LOD     | 1.07E+03 | <LOD     | <LOD   |
| RA4002    | 1     | SC-SC-Oral   | Female | <LOD   | 3.55E+06 | 6.65E+05 | <LOD     | 1.45E+04 | <LOD     | <LOD     | <LOD     | <LOD   |
| RA4000    | 1     | SC-SC-Oral   | Female | <LOD   | 2.73E+08 | 4.27E+03 | 2.38E+05 | 6.19E+04 | <LOD     | <LOD     | <LOD     | <LOD   |
| RA3936    | 2     | SC-Oral-Oral | Male   | <LOD   | 6.57E+06 | 4.43E+05 | 1.71E+05 | 2.52E+04 | <LOD     | <LOD     | <LOD     | <LOD   |
| RA3942    | 2     | SC-Oral-Oral | Male   | <LOD   | 1.58E+07 | 3.43E+05 | 1.12E+03 | <LOD     | <LOD     | <LOD     | <LOD     | <LOD   |
| RA3999    | 2     | SC-Oral-Oral | Female | <LOD   | 1.81E+07 | 1.99E+06 | 1.16E+05 | 1.90E+03 | <LOD     | <LOD     | <LOD     | <LOD   |
| RA4014    | 2     | SC-Oral-Oral | Female | <LOD   | 3.33E+07 | 2.32E+06 | 3.26E+04 | <LOD     | <LOD     | <LOD     | <LOD     | <LOD   |
| RA4001    | 2     | SC-Oral-Oral | Female | <LOD   | 1.42E+06 | 4.97E+05 | 3.84E+04 | 5.98E+02 | <LOD     | <LOD     | <LOD     | <LOD   |
| RA3949    | 3     | SC-Oral-Oral | Male   | <LOD   | 1.33E+08 | 1.84E+07 | 3.21E+05 | 1.49E+06 | 1.23E+04 | 2.73E+03 | 2.86E+02 | <LOD   |
| RA4011    | 3     | SC-Oral-Oral | Female | <LOD   | 4.47E+06 | 3.81E+06 | 2.48E+06 | 5.88E+04 | 4.40E+04 | 2.04E+05 | 1.56E+05 | <LOD   |

### Viral sgRNA in BAL samples

Gene copies per mL of subgenomic RNA (sgRNA) for individual NHP are shown in **Table S6**.

**Table S6.** Data for sgRNA in BAL samples as determined by RT qPCR passages for all groups. Values below the level of detection (LOD) of 119 gene copies per mL (GC/mL) are highlighted in yellow. For calculation of the geometric mean, half the LOD values (59 GC/mL) was used.

| Animal ID | Group | Routes       | Sex    | Day 42 | Day 57   | Day 59   | Day 61   | Day 63   |
|-----------|-------|--------------|--------|--------|----------|----------|----------|----------|
| RA3938    | 1     | SC-SC-Oral   | Male   | <LOD   | 9.84E+04 | 3.48E+04 | <LOD     | 2.58E+02 |
| RA3946    | 1     | SC-SC-Oral   | Male   | <LOD   | 2.06E+04 | 1.12E+04 | 4.57E+03 | <LOD     |
| RA3945    | 1     | SC-SC-Oral   | Male   | <LOD   | 1.58E+04 | 1.32E+04 | 1.94E+04 | <LOD     |
| RA4002    | 1     | SC-SC-Oral   | Female | <LOD   | 1.04E+05 | 3.11E+03 | 6.03E+03 | <LOD     |
| RA4000    | 1     | SC-SC-Oral   | Female | <LOD   | 9.63E+03 | <LOD     | <LOD     | <LOD     |
| RA3936    | 2     | SC-Oral-Oral | Male   | <LOD   | 1.56E+05 | 1.11E+04 | 1.31E+03 | <LOD     |
| RA3942    | 2     | SC-Oral-Oral | Male   | <LOD   | 8.88E+03 | 5.65E+02 | <LOD     | <LOD     |
| RA3999    | 2     | SC-Oral-Oral | Female | <LOD   | 2.81E+05 | 1.38E+05 | 1.47E+05 | <LOD     |
| RA4014    | 2     | SC-Oral-Oral | Female | <LOD   | 2.74E+05 | 1.19E+05 | 1.24E+04 | <LOD     |
| RA4001    | 2     | SC-Oral-Oral | Female | <LOD   | 1.32E+03 | <LOD     | <LOD     | <LOD     |
| RA3949    | 3     | SC-Oral-Oral | Male   | <LOD   | 1.91E+06 | 5.05E+05 | 1.57E+04 | 5.12E+03 |
| RA4011    | 3     | SC-Oral-Oral | Female | <LOD   | 6.78E+05 | 9.89E+04 | 8.58E+03 | 5.67E+03 |

### P values for nasal and BAL gRNA and sgRNA vaccinated NHP compared with placebo

The p values representing statistically significant differences between vaccinated NHP and placebo control g RNA (Fig. 5) and sgRNA (Fig. 6) when compared with placebo are shown in **Table S7**.

**Table S7.** The p values for statistically significant differences in gRNA and sgRNA for vaccinated versus placebo NHP. P values are shown for nasal and BAL gRNA (Fig. 5) and sgRNA (Fig. 6) for differences that were statistically significance when vaccinated NHP sample results were compared to placebo using one-way ANOVA with Dunnett's post-hoc comparison.

| Day Post-challenge                     | Nasal gRNA p value vs placebo |                  | BAL gRNA p value vs placebo |                  | Nasal sgRNA p value vs placebo |                  | BAL sgRNA p value vs placebo |                  |
|----------------------------------------|-------------------------------|------------------|-----------------------------|------------------|--------------------------------|------------------|------------------------------|------------------|
|                                        | SC > SC > Oral                | SC > Oral > Oral | SC > SC > Oral              | SC > Oral > Oral | SC > SC > Oral                 | SC > Oral > Oral | SC > SC > Oral               | SC > Oral > Oral |
| 1                                      |                               |                  | 0.0110                      | 0.0124           |                                |                  | 0.0015                       | 0.0026           |
| 2                                      | 0.0420                        | 0.0478           |                             |                  | 0.0097                         | 0.0132           |                              |                  |
| 3                                      | 0.0210                        | 0.0210           | 0.0810                      |                  | 0.0233                         | 0.0218           | 0.0167                       | 0.0348           |
| 4                                      |                               |                  |                             |                  | 0.0240                         | 0.0386           |                              |                  |
| 5                                      | 0.0102                        | 0.0064           |                             |                  | 0.0140                         | 0.0075           |                              |                  |
| 6                                      | 0.0006                        | 0.0006           |                             |                  | 0.0469                         | 0.0465           |                              |                  |
| 7                                      | 0.0388                        | 0.0367           | < 0.0001                    | < 0.0001         |                                |                  | <0.0001                      | <0.0001          |
| Only values showing significance shown |                               |                  |                             |                  |                                |                  |                              |                  |
